# Supplementary material for: Consensus statement on the need for innovation, transition and implementation of developmental neurotoxicity (DNT) testing for regulatory purposes
Source: PubMed Central journal article supplement (PMC6097873; doi:10.1016/j.taap.2018.02.004), 2018-09-01
Supplement: mmc1.pdf [file mmc1.pdf]

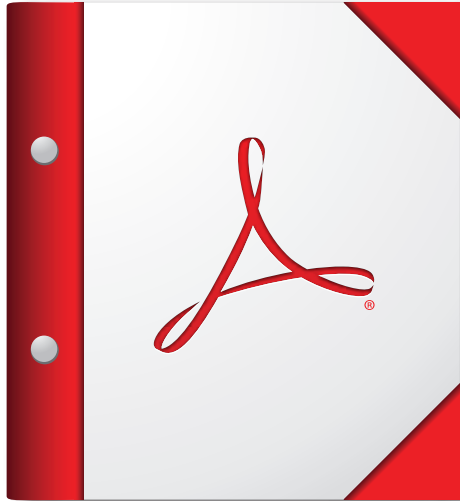

**For the best experience, open this PDF portfolio in  
Acrobat X or Adobe Reader X, or later.**

[Get Adobe Reader Now!](#)
